# Supplementary material
Source: MDPI journal article supplement (https://www.mdpi.com/2311-5637/8/3/122)
Supplement: s1 [file s1]

**Supplementary Materials:**

Table S1: Competitive inhibition of adherence of food borne pathogens to the Caco- 2 cells by selected probiotic strains.

| Strains                 | Adhesion (%)              |                           |                           |                           |
|-------------------------|---------------------------|---------------------------|---------------------------|---------------------------|
|                         | Control                   | L <sub>syn-0</sub>        | L <sub>syn-7</sub>        | L <sub>syn-15</sub>       |
| <i>L. rhamnosus</i>     | 8.99 ± 0.53 <sup>d</sup>  | 11.82 ± 0.79 <sup>c</sup> | 23.66 ± 0.47 <sup>a</sup> | 14.84 ± 0.83 <sup>b</sup> |
| <i>L. casei</i>         | 11.02 ± 0.97 <sup>d</sup> | 15.46 ± 0.57 <sup>b</sup> | 26.82 ± 0.52 <sup>a</sup> | 15.36 ± 0.50 <sup>b</sup> |
| <i>L. plantarum</i>     | 8.35 ± 1.03 <sup>d</sup>  | 15.38 ± 0.43 <sup>c</sup> | 26.69 ± 0.91 <sup>a</sup> | 17.82 ± 0.44 <sup>b</sup> |
| <i>L. monocytogenes</i> | 10.31 ± 1.76 <sup>a</sup> | 10.04 ± 1.09 <sup>a</sup> | 7.30 ± 1.92 <sup>b</sup>  | 7.76 ± 1.68 <sup>b</sup>  |
| <i>S. Typhimurium</i>   | 8.00 ± 1.18 <sup>a</sup>  | 8.18 ± 0.94 <sup>a</sup>  | 6.77 ± 1.39 <sup>b</sup>  | 6.66 ± 1.67 <sup>b</sup>  |
| <i>S. aureus</i>        | 8.35 ± 1.14 <sup>a</sup>  | 8.56 ± 1.20 <sup>a</sup>  | 4.01 ± 1.61 <sup>b</sup>  | 4.83 ± 1.71 <sup>b</sup>  |

Different lowercase superscripts in columns point out significant ( $P < 0.05$ ) differences between the values for different treatments.
